# Supplementary material
Source: MDPI journal article supplement (https://www.mdpi.com/2221-3759/11/1/12)
Supplement: s1 [file s1]

**A**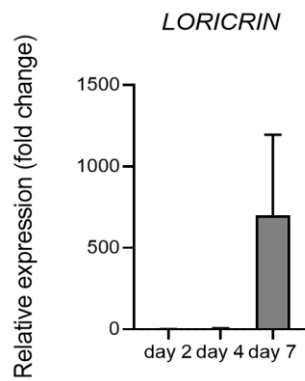**B**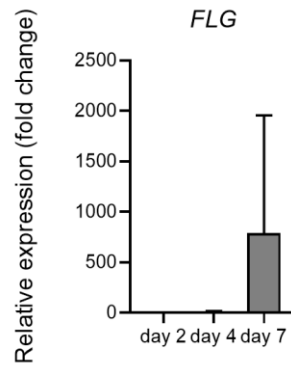

**Figure S1. Expression of differentiation markers in human keratinocytes maintained in confluent culture.** Primary human epidermal keratinocytes were cultured *in vitro*. RNA was prepared on days 2, 4 and 7 after cultures reached confluence, which enhances differentiation (Fischer et al. 2007). The RNA was subjected to RT-qPCR as described in the Materials and methods section. The graphs show the expression levels (fold change from day 2) of *LORICRIN* (**A**) and filaggrin (*FLG*) (**B**) relative to those of a house-keeping gene. The results of the *HMOX1* expression analysis of the same samples are shown in Figure 2B.

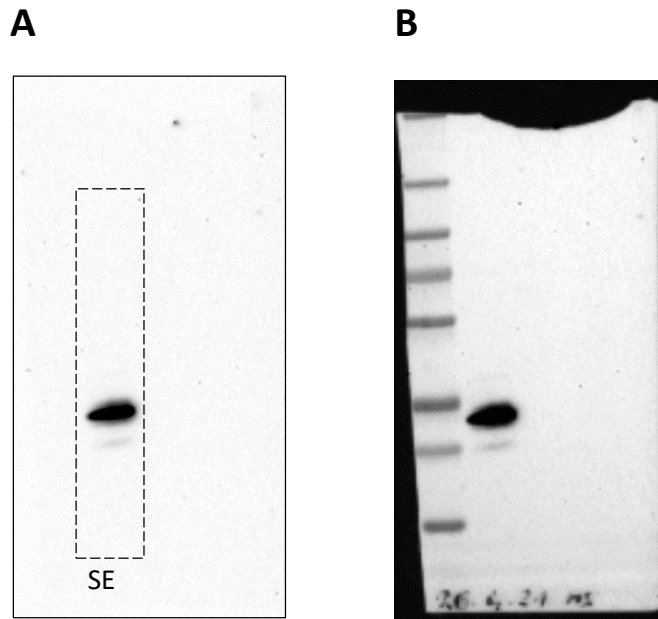

**Figure S2. Scan of the entire HO-1 western blot membrane shown in Figure 3A.** (A) Chemiluminescence signal of the entire membrane. (B) Chemiluminescence signal of the entire membrane merged with the light photography of the membrane to show the borders of the membrane and the pre-stained molecular weight marker. The rectangle (dashed line) in panel A marks the area shown in Figure 3A. This lane contains proteins from a human skin equivalent (SE). The purpose of the western blot was to test whether the anti-HO-1 antibody binds a protein of the expected mass. The band was detected at a molecular mass of 33 kD, confirming the specificity of the antibody.

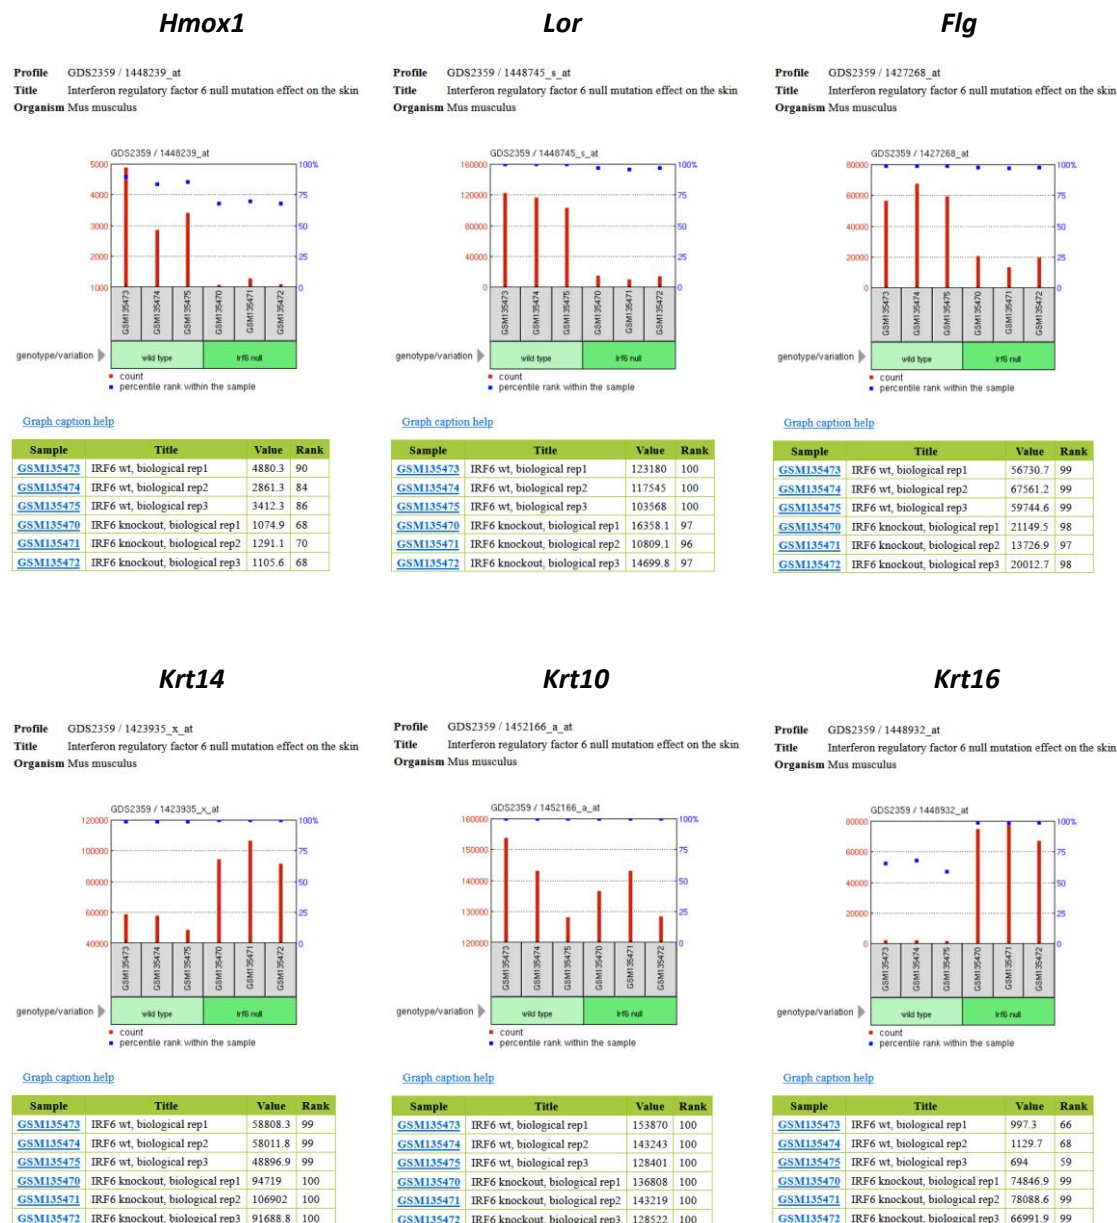

**Figure S3. *Hmox1* is expressed during development of mouse skin on embryonic day E17.5 and its expression is reduced in parallel to that of *loricrin* and *filaggrin* upon deletion of interferon regulatory factor 6 (*Irf6*).** Gene expression omnibus (GEO) dataset GDS2359, comprising microarray-based gene expression analysis of wildtype and *Irf6*-deficient mouse skin at embryonic day E17.5, was analyzed for the expression levels of *Hmox1*, two markers of keratinocyte terminal differentiation (*loricrin*, *Lor*; *filaggrin*, *Flg*), a basal layer keratin (*Krt14*), a suprabasal keratin (*Krt10*) and a stress-associated keratin (*Krt16*). *Irf6*-null mice lack terminally differentiated epidermal layers and the periderm (Ingraham et al. 2006). Note that expression of *Lor*, *Flg* and *Hmox1* is similarly reduced by *Irf6* deletion. The National Library of Medicine (NLM) is acknowledged for providing GEO profiles in the public domain for free distribution. Reference: Ingraham CR, Kinoshita A, Kondo S, Yang B, Sajan S, Trout KJ, Malik MI, Dunnwald M, Goudy SL, Lovett M, Murray JC, Schutte BC. Abnormal skin, limb and craniofacial morphogenesis in mice deficient for interferon regulatory factor 6 (*Irf6*). *Nat Genet.* **2006**, 38, 1335-1340. doi: 10.1038/ng1903.
